# Supplementary material
Source: publisher figshare collection journal article supplement (https://acs.figshare.com/ndownloader/files/27067783)
Supplement: Supplementary file 1 [file 27067783]

## Sheet: Table S7
	Normalized intensity (sum of all PRM transition areas)													Median log2 FC
p-site	FOXO3_S299	AKT1S1_T246	AKT1S1_S183	TSC2_S1449	RICTOR_T1135	CEP170_S1160	CEP170B_S1179	FAM63A_S441	FAM83H_S1025	MLPH_S337	MLPH_S337;297	ZCCHC6_S132	ZBTB21_S411	All
Modified sequence	R.S[+80]SDELDAWTDFR.S	R.LNT[+80]SDFQK.L	K.S[+80]LPVSVPVWGFK.E	R.GQPEGPLPSSS[+80]PR.S	R.TLT[+80]EPSVDFNHSDDFTPISTVQK.T	R.LGS[+80]LSAR.S	R.AGS[+80]FTGTSDPEAAPAR.T	R.VLS[+80]LQGR.G	R.LSS[+80]ATANALYSSNLR.D	R.ASS[+80]ESQIFELNK.H	R.ASS[+80]ESQGLGAGVR.T	R.KDS[+80]FQENEDGYR.W	R.SFS[+80]ASQSTDR.E
Sample
Control, R1	5.96841e+07	4.73233e+08	2.10219e+07	7.17345e+07	7.57199e+06	3.67187e+07	8.81988e+07	2.69182e+07	4.16491e+07	1.33175e+07	1.9341e+08	1.89688e+07	6.43589e+07	0
Control, R2	7.51279e+07	4.94276e+08	1.73802e+07	6.86073e+07	8.9224e+06	3.57012e+07	8.98638e+07	2.5163e+07	4.11024e+07	1.28174e+07	1.89023e+08	2.04764e+07	7.28169e+07
Control, R3	6.03789e+07	5.47212e+08	1.66166e+07	7.46272e+07	8.82093e+06	4.12289e+07	1.00139e+08	2.84692e+07	4.20777e+07	1.42344e+07	2.32347e+08	2.14066e+07	7.87653e+07
AZD5363, R1	2.85807e+07	8.21222e+07	6.71699e+06	5.81593e+07	868481	1.50326e+07	4.57116e+07	8.26849e+06	1.35087e+07	5.87314e+06	4.49472e+07	8.60039e+06	4.50445e+07	-1.3546
AZD5363, R2	2.65491e+07	8.06534e+07	5.71115e+06	5.56768e+07	810333	1.47671e+07	4.47959e+07	7.58222e+06	1.22017e+07	5.80951e+06	4.28913e+07	8.47429e+06	4.17983e+07
AZD5363, R3	3.02661e+07	8.116e+07	5.98327e+06	5.74089e+07	886603	1.46419e+07	4.63431e+07	7.71671e+06	1.28232e+07	5.78537e+06	4.31251e+07	8.92092e+06	4.3454e+07
GSK2110183, R1	4.79725e+07	2.05505e+08	1.48398e+07	6.50383e+07	3.24344e+06	2.18671e+07	5.69886e+07	1.03714e+07	2.34199e+07	9.43234e+06	8.13005e+07	1.16492e+07	7.06438e+07	-0.863978
GSK2110183, R2	4.75329e+07	1.97078e+08	1.8736e+07	6.57059e+07	3.37511e+06	2.13929e+07	5.54984e+07	1.02946e+07	2.08829e+07	9.80433e+06	8.05139e+07	1.08172e+07	7.05711e+07
GSK2110183, R3	4.11266e+07	1.78141e+08	1.55412e+07	5.54993e+07	3.02616e+06	1.91827e+07	4.83258e+07	8.78177e+06	1.854e+07	9.25815e+06	7.08327e+07	9.64625e+06	6.11723e+07
GSK690693, R1	2.82397e+07	6.80521e+07	9.65275e+06	5.76985e+07	1.54523e+06	1.50237e+07	4.21743e+07	5.74747e+06	1.92422e+07	5.66132e+06	4.63139e+07	1.12902e+07	4.21609e+07	-1.12522
GSK690693, R2	3.74108e+07	6.69129e+07	1.19587e+07	6.11287e+07	1.97309e+06	1.54834e+07	4.34262e+07	5.29523e+06	1.95785e+07	5.46252e+06	4.83596e+07	1.10013e+07	4.58938e+07
GSK690693, R3	2.62886e+07	6.33252e+07	1.09936e+07	5.93469e+07	1.44409e+06	1.54918e+07	4.26147e+07	5.59729e+06	1.8405e+07	5.34865e+06	4.74842e+07	1.07036e+07	4.35266e+07
Ipatasertib, R1	4.05369e+07	1.1487e+08	1.32357e+07	6.2697e+07	1.70139e+06	1.70994e+07	4.84478e+07	7.41615e+06	1.65734e+07	8.33832e+06	5.69985e+07	9.34067e+06	5.86335e+07	-1.09044
Ipatasertib, R2	3.9577e+07	1.25456e+08	1.24714e+07	5.85794e+07	1.79888e+06	1.70988e+07	4.7212e+07	7.3326e+06	1.704e+07	8.05333e+06	5.6849e+07	9.54444e+06	5.71581e+07
Ipatasertib, R3	4.94845e+07	1.38753e+08	1.55683e+07	6.63266e+07	2.04156e+06	1.91733e+07	5.10994e+07	8.11181e+06	1.9139e+07	8.00751e+06	6.10943e+07	9.58455e+06	6.12773e+07
MK-2206, R1	3.74175e+07	9.11455e+07	8.63001e+06	5.4159e+07	1.91131e+06	1.4947e+07	4.75262e+07	7.15186e+06	1.93995e+07	7.11383e+06	5.572e+07	1.0989e+07	3.00513e+07	-1.15815
MK-2206, R2	3.53922e+07	9.05206e+07	7.98322e+06	5.51121e+07	1.92002e+06	1.65308e+07	4.99846e+07	6.77471e+06	2.06952e+07	7.88121e+06	6.29414e+07	1.18486e+07	3.17262e+07
MK-2206, R3	2.46447e+07	7.9276e+07	8.04e+06	5.63184e+07	2.12247e+06	1.56926e+07	5.0866e+07	7.33447e+06	2.17461e+07	7.82255e+06	6.17319e+07	1.04506e+07	3.26334e+07
Uprosertib, R1	3.3004e+07	6.07944e+07	8.48668e+06	5.5392e+07	1.79986e+06	1.51101e+07	3.5488e+07	5.97361e+06	1.75923e+07	6.32698e+06	4.81882e+07	8.65815e+06	3.86607e+07	-1.3066
Uprosertib, R2	3.78867e+07	6.56522e+07	8.97178e+06	5.36792e+07	1.64378e+06	1.48783e+07	3.73947e+07	5.83625e+06	1.73776e+07	6.53296e+06	4.69974e+07	9.01794e+06	3.92766e+07
Uprosertib, R3	3.81225e+07	5.99657e+07	8.32135e+06	5.29177e+07	1.32558e+06	1.44065e+07	3.76704e+07	5.20764e+06	1.5495e+07	6.31697e+06	4.54064e+07	8.56407e+06	3.72966e+07
Miransertib, R1	3.93874e+07	1.42914e+08	1.60381e+07	5.953e+07	3.14032e+06	1.9713e+07	4.88357e+07	9.30958e+06	2.62354e+07	9.38554e+06	7.28511e+07	1.17746e+07	3.71849e+07	-0.868387
Miransertib, R2	4.42634e+07	1.62867e+08	1.52081e+07	6.32639e+07	3.27202e+06	2.17271e+07	5.35919e+07	9.94414e+06	2.94129e+07	1.06841e+07	8.1158e+07	1.31279e+07	4.01732e+07
Miransertib, R3	3.83942e+07	1.55127e+08	1.67014e+07	6.0693e+07	3.57219e+06	2.03102e+07	4.99601e+07	9.38715e+06	2.59177e+07	9.7729e+06	7.64738e+07	1.22831e+07	3.74268e+07
Perifosine, R1	6.71335e+07	5.17046e+08	1.32224e+07	8.49175e+07	6.72199e+06	4.98622e+07	1.07952e+08	3.55293e+07	5.00908e+07	1.59732e+07	2.07858e+08	2.29257e+07	8.83149e+07	0.128588
Perifosine, R2	6.86878e+07	4.95365e+08	1.36537e+07	7.53485e+07	5.85499e+06	4.71915e+07	9.71112e+07	2.49571e+07	4.78848e+07	1.41687e+07	1.89834e+08	2.03381e+07	8.24024e+07
Perifosine, R3	6.48018e+07	4.88438e+08	1.23644e+07	8.00838e+07	6.5058e+06	4.74103e+07	9.90737e+07	3.01398e+07	5.19938e+07	1.76371e+07	2.1092e+08	2.13493e+07	8.22916e+07
PHT-427, R1	6.55798e+07	4.65235e+08	8.12401e+06	7.20549e+07	6.45802e+06	3.63517e+07	7.70603e+07	2.89453e+07	2.99044e+07	1.28032e+07	1.90806e+08	1.62824e+07	6.63905e+07	-0.0667803
PHT-427, R2	5.25903e+07	4.68684e+08	6.44587e+06	7.53861e+07	7.08302e+06	3.71458e+07	8.23561e+07	2.50255e+07	3.14183e+07	1.37714e+07	1.90836e+08	1.55047e+07	6.96684e+07
PHT-427, R3	8.33663e+07	5.03622e+08	5.96892e+06	7.8015e+07	8.08629e+06	4.13728e+07	8.32544e+07	2.77483e+07	3.06884e+07	1.52792e+07	2.15817e+08	1.72497e+07	7.01144e+07
AKT inhibitor VIII, R1	5.13604e+07	2.22772e+08	7.32296e+06	5.90263e+07	3.941e+06	2.34715e+07	4.78572e+07	1.23737e+07	1.67596e+07	1.02461e+07	9.70632e+07	1.23634e+07	4.59962e+07	-0.96328
AKT inhibitor VIII, R2	4.7321e+07	2.15111e+08	6.51966e+06	5.9059e+07	3.7559e+06	2.25917e+07	4.75101e+07	1.34063e+07	1.65162e+07	1.00549e+07	9.138e+07	1.14007e+07	4.43871e+07
AKT inhibitor VIII, R3	5.10218e+07	2.28874e+08	7.59375e+06	5.83957e+07	3.75106e+06	2.29377e+07	4.73195e+07	1.19764e+07	1.60937e+07	1.05029e+07	9.16581e+07	1.21329e+07	4.42862e+07
SC-79, R1	5.81071e+07	5.15273e+08	3.43518e+07	7.49342e+07	7.53914e+06	4.50256e+07	1.03342e+08	2.75713e+07	4.54182e+07	1.51276e+07	1.84847e+08	1.80473e+07	8.10872e+07	0.107126
SC-79, R2	7.11125e+07	5.52065e+08	4.15761e+07	7.64032e+07	8.88766e+06	4.53289e+07	1.07211e+08	2.82498e+07	5.43226e+07	1.52886e+07	1.91005e+08	1.8859e+07	8.24285e+07
SC-79, R3	5.6976e+07	5.64138e+08	4.49874e+07	7.89628e+07	8.4262e+06	4.66166e+07	1.08143e+08	3.00217e+07	5.44034e+07	1.56876e+07	1.87513e+08	2.06041e+07	8.22324e+07
